# 1 Exome-wide association studies discover germline mutation patterns 2 and identify high-risk populations in human cancers

3 **Running head:** Exome-wide association studies (ExWAS) in pan-cancer

4

5 Sipeng Shen, PhD<sup>1,2,3\*</sup>; Yunke Jiang, MS<sup>1</sup>; Guanrong Wang, MS<sup>1,4</sup>; Hongru Li, MS<sup>1</sup>;  
6 Dongfang You, PhD<sup>1,3</sup>; Weiwei Duan, PhD<sup>6</sup>; Ruyang Zhang, PhD<sup>1,5</sup>; Yongyue Wei,  
7 PhD<sup>1,3</sup>; Hongbing Shen<sup>2,7</sup>, PhD; Zhibin Hu, PhD<sup>2,7</sup>; David C. Christiani, MD<sup>8,9</sup>; Yang  
8 Zhao, PhD<sup>1,5\*</sup>; Feng Chen, PhD<sup>1,2,3\*</sup>

9

10 <sup>1</sup>Department of Biostatistics, Center for Global Health, School of Public Health,  
11 Nanjing Medical University, Nanjing 211166, China

12 <sup>2</sup>Jiangsu Key Lab of Cancer Biomarkers, Prevention and Treatment, Jiangsu  
13 Collaborative Innovation Center for Cancer Personalized  
14 Medicine, Nanjing Medical University, 211166, Nanjing, China

15 <sup>3</sup>China International Cooperation Center of Environment and Human Health, Nanjing  
16 Medical University

17 <sup>4</sup>Department of Epidemiology, Jiangsu Health Development Research Center, Jiangsu  
18 Province, Nanjing 210036, China

19 <sup>5</sup>Key Laboratory of Biomedical Big Data of Nanjing Medical University, Nanjing  
20 211166, China

21 <sup>6</sup>Department of Bioinformatics, School of Biomedical Engineering and Informatics,  
22 Nanjing Medical University, Nanjing, Jiangsu 211166, China

23 <sup>7</sup>Department of Epidemiology, Center for Global Health, School of Public Health,

24 Nanjing Medical University, Nanjing 211166, China, Nanjing, Jiangsu 211166, China

25 <sup>8</sup>Department of Environmental Health, Harvard T.H. Chan School of Public Health,  
26 Harvard University, Boston, MA 02115, USA

27 <sup>9</sup>Pulmonary and Critical Care Division, Massachusetts General Hospital, Department  
28 of Medicine, Harvard Medical School, Boston, MA 02114, USA

29

30 **\*Send correspondence to:**

31 Dr. Feng Chen, SPH Building Room 412, 101 Longmian Avenue, Nanjing, Jiangsu  
32 211166, China. Email: [fengchen@njmu.edu.cn](mailto:fengchen@njmu.edu.cn)

33 Dr. Yang Zhao, SPH Building Room 404, 101 Longmian Avenue, Nanjing, Jiangsu  
34 211166, China. Email: [zhaoyang@njmu.edu.cn](mailto:zhaoyang@njmu.edu.cn)

35 Dr. Sipeng Shen, SPH Building Room 406, 101 Longmian Avenue, Nanjing, Jiangsu  
36 211166, China. Email: [sshen@njmu.edu.cn](mailto:sshen@njmu.edu.cn)

37

38 **Consent for publication**

39 All authors have reviewed and approved this manuscript.

40

41 **Conflicts of interest statements/Financial Disclosure statement:** The authors report  
42 no conflicts of interest.

43 **Funding**

44 This study was supported by the National Natural Science Foundation of China  
45 (82103946 to S.S., 82173620 to Y.Z., 81530088 to F.C.), National Key Research and  
46 Development Program of China (2016YFE0204900 to F.C.), Natural Science

---

47 Foundation of the Jiangsu Higher Education Institutions of China (21KJB330004 to  
48 S.S.).

49 **Author contributions**

50 SS, YZ, and FC contributed to the study design. SS and YJ contributed to data  
51 collection. SS performed statistical analyses and interpretation. SS drafted the  
52 manuscript. GW, HL, DY, WD, RZ, YW, HS, ZH, and DC revised the final  
53 manuscript. All authors approved the final version of the manuscript.

54

55

## 56 Abstract

57 Genome-wide association studies have discovered numerous common variants  
 58 associated with human cancers. However, the contribution of exome-wide rare  
 59 variants to cancers remains largely unexplored, especially for the protein-coding  
 60 variants. The UK Biobank provides detailed cancer follow-up information linked to  
 61 whole-exome sequencing (WES) for approximately 450,000 participants, offering an  
 62 unprecedented opportunity to evaluate the effect of exome variation on pan-cancer.  
 63 Here, we performed exome-wide association studies (ExWAS) based on single variant  
 64 levels and gene levels to detect their associations across 20 primary cancer types in  
 65 the discovery set (WES-300k, N = 284,456) and replication set (WES-150k, N =  
 66 143,478), separately. The ExWAS detected 143 independent variants at variant-level  
 67 and 49 genes at gene-level, while nine variants and eight genes were shared across  
 68 cancers. In the cross-trait meta-analysis, we identified 239 additional independent  
 69 pleiotropic variants, mapping to the genes which were functional through trans-omics  
 70 analyses in transcriptomics and proteomics. Further, we developed exome-wide risk  
 71 scores (ERS) to identify high-risk populations based on rare variants with minor allele  
 72 frequency (MAF) < 0.05. The ERS had satisfactory performance in cancer risk  
 73 stratification, especially for the extremely high-risk persons (top 5% ERS) that were  
 74 frequently risk allele carriers. The ERS (median C-index (IQR): 0.655 (0.636-0.667))  
 75 outperforms the traditional polygenic risk score (PRS) (median C-index (IQR): 0.585  
 76 (0.572-0.614)) for discrimination in the replication set. Our findings offer further  
 77 insight into the genetic architecture of human exomes for cancer susceptibility.

78 **Keywords:** exome-wide association studies, pan-cancer, rare variants, polygenic risk  
 79 score, cross-trait

80



## 81 Introduction

82 Cancer ranks as a leading cause of death and a critical barrier to increasing life  
83 expectancy worldwide <sup>1</sup>. Population-based early screening approaches showed a  
84 remarkable reduction in cancer mortality <sup>2</sup>, such as low-dose computed tomography  
85 (CT) screening for lung cancer <sup>3,4</sup>. Considering the cost-effectiveness balance, it is  
86 generally agreed that screening should be limited to the high-risk population.  
87 However, precisely identifying high-risk persons is still challenging, while cancer is a  
88 complex disease that derives from environmental exposure and inherent heredity <sup>5</sup>.

89 Cancer shows substantial heritability from genetic variants <sup>6</sup>. Genome-wide  
90 association studies (GWAS) have identified numerous associations of genome-wide  
91 significance between genetic variants and common diseases <sup>7</sup>. However, common  
92 single nucleotide polymorphisms (SNPs) identified in GWAS explain only a small  
93 fraction of heritability, which might be limited to the coverage of SNP arrays <sup>8</sup>.  
94 Exome-wide association studies (ExWAS) have shown that rare coding variants tend  
95 to have larger phenotypic effects than common SNPs and contribute an essential  
96 component of heritability <sup>9</sup>. Due to the effect allele frequency being generally low in  
97 ExWAS, the sample size should be large (e.g.,  $n > 100,000$ ) to guarantee the statistical  
98 power, especially for the rare variants <sup>10,11</sup>.

99 Moreover, it is widely recognized that the polygenic risk score (PRS) is a powerful  
100 tool to discriminate the high-risk population susceptible to specific cancer <sup>12,13</sup>.  
101 However, most PRSs are generated using common variants derived from the SNP  
102 array, which ignore the rare variants with larger effects, especially those located on  
103 exomes with remarkable biological significance <sup>14,15</sup>. Thus, the rare variants might  
104 provide complementarity value for cancer risk stratification based on traditional PRS.

105 The UK Biobank (UKB) is a powerful resource for evaluating the associations  
106 between coding variants and human diseases because of its large sample size with

high-quality whole-exome sequencing (WES) data ( $n \approx 450,000$ )<sup>16,17</sup>. In our study, we investigated the landscape of genetic variants with multiple primary cancers through UKB WES project. Further, we leveraged the rare variants to improve the risk stratification models to identify the high-risk population.

## Results

### *Exome-wide association study for single variants*

Our study included the whole-exome sequencing 450k (WES-450k in data-field 23148) population of European ancestry in UK Biobank (Table S1). To ensure the robustness of the results, we conducted a two-stage association study in two separate datasets: discovery set (interim WES-300k in data-field 23146,  $N = 284,456$ ) and replication set (the remaining WES-150k,  $N = 143,478$ ). Overall, our study included 20 cancer types containing 106,836 primary cancer cases and 321,098 shared cancer-free controls. The number of cancer cases ranged from 773 (thyroid cancer) to 32,307 (skin cancer). 1,769,329 exome single nucleotide variants (SNVs) annotated putative loss-of-function (LoF), missense, and synonymous passed the quality control procedures.

For single-variant analyses, 306,031 variants with minor allele count (MAC)  $\geq 10$  were tested in ExWAS. The genomic inflation factor (GIF) values suggested no obvious population stratification (Figure S1). When combining all the  $P$  values of pan-cancer, the GIF was 1.105, indicating the existing pleiotropic effects (Figure S2).

Among the 20 cancer types, ExWAS detected 255 signals from 242 variants that passed the genome-wide significance level ( $P < 5 \times 10^{-8}$ ) in 12 cancer types. After LD pruning, we observed 153 independent signals across 64 chromosome regions

(LD- $r^2 < 0.5$ ) (Figure 1a, Table S2). The top variant with maximum association signals was rs555607708 (22:28695868:AG:A, frameshift variant of *CHEK2*, HGVS: p.Thr367fs, effect allele frequency: 0.22%), which was associated with three cancer types including breast [OR (95% CI): 4.15 (3.16-5.43),  $P = 7.24 \times 10^{-25}$ ], prostate [OR (95% CI): 2.40 (1.82-3.16),  $P = 3.48 \times 10^{-10}$ ] and leukemia [OR (95% CI): 8.48 (4.12-17.48),  $P = 1.21 \times 10^{-9}$ ].

Additionally, eight independent variants had significant associations with at least two cancer types, leading by rs6998061 (OR=0.82~0.89, missense variant in *POU5F1B*), rs16891982 (OR=1.42~1.46, missense variant in *SLC45A2*), rs387907272 (beta=24.1~76.2, LoF variant in *MYD88*), rs3787220 (OR=0.85~0.88, synonymous variant in *NCOA6*), rs77681059 (OR=1.11~1.32, missense variant in *TUBB3*), rs1805007 (OR=1.34~1.64, missense variant in *MC1R*), rs56288641 (OR=1.28~1.59, missense variant in *VPS9DI*), rs1126809 (OR=1.13~1.23, missense variant in *TYR*). More than half of the variants were shared between skin cancer and melanoma, including three variants located on 16q24.3. The remaining three variants were shared among breast, prostate, leukemia, colorectal cancers, and non-Hodgkin's lymphoma (NHL) (Table S3).

### Exome-wide association study based on gene-level

In addition to the variant-level analyses, we performed gene-based association studies to capture the effects of ultra-rare variants. We used different genetic models to detect the signals, according to minor allele frequency threshold (0.05, 0.01, 0.001) and variant functional annotation (LoF, LoF+missense, LoF+missense+synonymous). After Bonferroni correction, 49 genes were considered significant ( $P < 2.5 \times 10^{-6}$ ) (Figure 1b, Table S4). The top genes with the highest hit frequency were *CHEK2* [breast (OR = 1.03,  $P = 1.08 \times 10^{-22}$ ), prostate (OR = 1.02,  $P = 1.28 \times 10^{-12}$ ), leukemia (OR = 1.04,  $P = 1.55 \times 10^{-13}$ ), *BRCA2* [breast (OR = 1.08,  $P = 1.43 \times 10^{-38}$ ), ovary (OR

157 = 1.14,  $P = 1.94 \times 10^{-30}$ ), prostate (OR = 1.04,  $P = 5.98 \times 10^{-8}$ ), and *ATM* [breast (OR =  
158 1.10,  $P = 4.33 \times 10^{-10}$ ), prostate (OR = 1.04,  $P = 1.89 \times 10^{-9}$ ), pancreas (OR = 1.04,  $P =$   
159  $2.67 \times 10^{-7}$ )], which were associated with three cancer types. *VPS9D1*, *SLC45A2*,  
160 *BRCA1*, *MSH6*, and *MC1R* were associated with two cancer types (Table S5).

161 We summarized the association results of genes that reached significance level in at  
162 least two cancer types from variant-level and gene-level analyses (Figure 1c). Four  
163 genes, including *CHEK2*, *ATM*, and *BRCA1/2*, showed a close relationship with  
164 human cancers.

### 165 *Shared genetic cross-trait meta-analyses identify pleiotropic signals*

166 To identify additional potential pleiotropic variants associated with multiple cancers,  
167 we performed a cross-trait meta-analysis using Association analysis based on  
168 SubSETs (ASSET). 1,572 variants that reached  $P < 10^{-4}$  in any cancer type were  
169 included. We identified 150 independent variants (mapping to 86 genes, 43  
170 chromosome cytobands) with significant one-directional effects (Table S6) and 89  
171 independent variants (mapping to 38 genes, 16 cytobands) with significant  
172 bidirectional effects (Table S7) (Figure 2a).

173 We checked the pleiotropic variants in NHGRI-EBI GWAS Catalog<sup>18</sup>, a publicly  
174 available database that collected all published GWAS signals phenome-wide. The due  
175 date of associations collection was April 7, 2022. More than half of the identified  
176 variants were not reported in GWAS Catalog [100 novel one-directional variants (66.7%  
177 of all), 59 novel bidirectional variants (66.3% of all)] (Table S6-S7).

178 We also summarized the shared genetic variants across cancers identified in ASSET  
179 subgroups according to their effect direction (Figure 2b). The top cancer pairs with  
180 the highest shared one-directional variants were skin & melanoma (79 variants), skin  
181 & thyroid (69 variants), sarcoma & skin (51 variants), NHL & skin (50 variants),  
182 esophagus & skin (47 variants). The top cancer pairs with the highest heterogeneous

bidirectional variants were leukemia & thyroid (51 variants), liver & thyroid (50 variants), lung & sarcoma (48 variants), skin & liver (48 variants), lung & thyroid (48 variants) ([Table S8](#)).

### ***Trans-omics functional analysis for the identified genes***

We performed a trans-omics analysis to integrate the identified genes from single variant, gene based and cross-trait meta-analyses into transcriptomics and proteomics. Gene expression was obtained from the recompute transcriptomic data of The Cancer Genome Atlas (TCGA) and The Genotype-Tissue Expression (GTEx). 98 unique protein-coding genes across 15 tissue types that passed quality control were included. Through comparisons of gene expression in tumor and healthy normal tissues, we observed remarkable differences in gene expression. The well-known *HLA* family genes, *BRCA1/2*, *CHEK2*, and *TUBB3* were up-regulated in tumor tissues, while *ATM*, *VPS9DI*, and *MC1R* were down-regulated. However, some genes showed heterogenous trends across cancers, such as the *KRT* family, *POU5F1B*, and *TET2* ([Figure 3a, 3b](#)).

Further, we performed a KEGG pathway enrichment analysis for the identified genes. Numerous immune-related pathways were identified, such as Th1 and Th2 cell differentiation ( $P = 1.46 \times 10^{-3}$ ), Th17 cell differentiation ( $P = 2.63 \times 10^{-3}$ ), and inflammatory bowel disease ( $P = 3.94 \times 10^{-4}$ ), as well as the classical cancer-related pathways, including cell adhesion molecules ( $P = 1.29 \times 10^{-5}$ ), platinum drug resistance ( $P = 6.14 \times 10^{-4}$ ), p53 signaling pathway ( $P = 6.14 \times 10^{-4}$ ), and NF-kappa B signaling pathway ( $P = 0.018$ ) ([Figure 3e, Table S9](#)).

Proteomic data were collected across ten tissue types from The National Cancer Institute's Clinical Proteomic Tumor Analysis Consortium (CPTAC). We observed moderate differences by comparing protein abundance in tumor and adjacent normal

tissues. Interestingly, some proteins showed similar patterns with the corresponding gene expression, such as *HLA* family genes and *CHEK2*. However, a reverse trend was also found for some genes. For example, *BRCA2* was down-regulated in proteomics of tumor tissues (Figure 3c, 3d).

Using the STRING database to integrate all known and predicted proteins-protein interactions, we identified two large clusters: one was related to the HLA (e.g., HLA family genes, *MICA*, *BTNL2*) and immune function (e.g., *CTLA4*, *CTSS*, *SAMHD1*); another was related to DNA damage response and repair (e.g., *BRCA2*, *ATM*, *CHEK2*, *MSH6*) (Figure 3f). In addition, three small clusters were also identified, including the keratin family, BPI fold containing family B, and melanogenesis.

### Identify high-risk population based on rare variants

We developed exome-wide risk scores (ERS) to identify high-risk population based on rare variants with minor allele frequency (MAF) < 0.05 for incident cancers. The discovery set (WES-300k population) was used for risk score training, while the replication set (WES-150k) was used for external validation. After screening using the least absolute shrinkage and selection operator (LASSO) with 10-fold cross-validation, we included a moderate number of rare variants in ERS (median [interquartile range (IQR)]: 103 (82-199)), ranging from 39 variants (thyroid) to 585 variants (skin) (Table S10).

We performed a risk stratification analysis to identify the high-risk populations susceptible to specific cancer types. We defined three risk levels: extremely high-risk (top 5% ERS), high-risk (5%-25% ERS), and low-risk (bottom 75% ERS), which might be applicable to different medical screening strategies. The ERS could stratify the cancer absolute incidence risk significantly in the replication set (Figure 4) and the whole UKB-450k population (Figure S4) (all log-rank  $P < 2.2 \times 10^{-16}$ ). Using the low-risk population as the reference, the extremely high-risk persons had hazard ratios

(HRs) ranging from 4.52 to 9.92 [median (IQR): 7.20 (6.44-7.85)], which outperformed PRS [HR median (IQR): 2.44 (1.95-2.80)]. The high-risk persons had HRs ranging from 1.37 to 4.43 [median (IQR): 1.97 (1.75-2.33)], while the PRS had HRs ranging from 1.11 to 2.15 with median (IQR): 1.56 (1.41-1.79) (Figure 5a, 5b). Thus, the ERS had satisfactory performance in cancer risk stratification, especially for the extremely high-risk persons that were frequently risk allele carriers. The distributions of ERS in each cancer type were shown in Figure S5. Most people did not carry the causal alleles, while only a few were high-risk carriers. The density plot of cases and controls indicated the cancer cases had obvious larger ERS than controls (Figure S6).

Further, we evaluated the discrimination abilities of ERS and PRS using the C-index for ten-year cancer incidence. The C-index values in the replication set were stable, ranging from 0.601 to 0.686 [median (IQR): 0.655 (0.636-0.667)], outperforming the traditional PRS [median (IQR): 0.585 (0.572-0.614)] (Figure 5c). Through Spearman correlation analysis, we found low correlation between ERS and PRS (average  $r_s = 0.016$ ), indicating the complementary predictive value for the rare exome variants (Table S11).

251

## 252 **Methods**

### 253 *Study population and phenotype definition*

The UK Biobank (UKB) is a population-based prospective cohort of individuals aged 40–69 years, enrolled between 2006 and 2010. The work described herein was approved by the UK Biobank under application no. 83445. All the phenotype data were accessed in March 2022.

Health-related outcomes were ascertained via individual record linkage to national

cancer and mortality registries and hospital in-patient encounters. Cancer diagnoses were coded by International Classification of Diseases version 10 (ICD-10) codes. Individuals with at least one recorded incident diagnosis of a borderline, in situ, or primary malignant cancer were defined as cases collected from data fields 41270 (Diagnoses - ICD10), 41202 (Diagnoses - main ICD10), 40006 (Type of cancer: ICD10), and 40001 (primary cause of death: ICD10). Finally, we analyzed 20 primary cancer types with overall cases > 500, including bladder, brain, breast, colorectal, esophagus, head and neck, kidney, lung, leukemia, liver, non-Hodgkin's lymphoma (NHL), ovary, pancreas, prostate, sarcoma, melanoma, skin (non-melanoma), stomach, thyroid, uterus cancers.

To ensure the robustness of the results and validate the risk stratification model, we used the WES-300k population released on Sep 28<sup>th</sup> 2021 as the discovery set and the remaining WES-150k population additionally released on Oct 29<sup>th</sup> 2021 as the replication set. We included only participants of European ancestry. The demographic and cancer characteristics were described in [Table S1](#). All the data analyses were performed on DNAnexus Research Analysis Platform (RAP).

### *Quality control for the genetic variants*

Whole-exome sequencing data for UKB participants were generated using the IDT xGen v1 capture kit on the NovaSeq6000 platform. The UK Biobank WES 450k release includes CRAM and gVCF files processed using the OQFE protocol<sup>19</sup>. Single-sample variants were called from OQFE CRAMs with DeepVariant 0.0.10 employing a retrained model and are provided as single-sample gVCFs. All gVCFs were aggregated with GLnexus 1.2.6 using the default joint-genotyping parameters for DeepVariant. The OQFE protocol maps to a full GRCh38 reference version including all alternative contigs in an alt-aware manner. Genotype depth filters (SNV DP $\geq$ 7, indel DP $\geq$ 10) were applied prior to variant site filters requiring at least one



variant genotype passing an allele balance filter (heterozygous SNV  $AB > 0.15$ , heterozygous indel  $< 0.20$ ). The detailed parameters were described in Category 170 of the UKB showcase. In addition, we filtered out the variants with low allele counts if a variant had minor allele count (MAC)  $< 3$  in the discovery set or MAC  $< 2$  in the replication set.

### ***Exome-wide association for single variants and gene levels***

Single-variant and gene-based association analyses were performed using SAIGE v1.0.5<sup>20,21</sup>. SAIGE is a toolkit developed for genome-wide association tests in biobank level datasets, which uses saddlepoint approximation to handle extremely case-control imbalance of binary traits and linear mixed models to account for sample relatedness. The variant-level association tests included high-quality and reliable variants with MAC  $\geq 10$ . The exact inclusion criteria for single variants were: (i) MAC  $\geq 3$  in both cases and controls in the discovery set; (ii) MAC  $\geq 2$  in both cases and controls in the replication set. The variants were functionally annotated using Variant Effect Predictor (VEP) software<sup>22</sup>. In addition to the coding variants that alter protein sequences, synonymous variants could also disturb the level of mRNA expression and have non-neutral functions<sup>23,24</sup>. Thus, variants annotated as putative loss-of-function (LoF, including nonsense, splice site, and frameshift variants), missense, and synonymous were included in the analysis. Independent variants were pruned out using the PLINK v1.9 clump function (`--clump-r2 0.50 --clump-kb 500`).

For gene-based analysis, we included rare and ultra-rare variants with minor allele frequency (MAF)  $< 0.05$ ,  $0.01$ , or  $0.001$ . Three genetic models were considered: LoF, LoF+missense, LoF+missense+synonymous. Of all the combinations, we reported the association results with the lowest  $P$  value to collectively capture a wide range of genetic architectures<sup>25</sup>. The effect sizes and 95% confidence interval (CI) of genes were estimated by burden tests.

311 In all the association analyses, we adjusted the covariates including age, gender  
312 (excluding sex-specific tumors), Body Mass Index (BMI), smoking status (binary),  
313 drinking status (binary), and the top 10 principal components (PCs). Meta-analysis  
314 was used to summarize the results between discovery and replication sets for single  
315 variants by METAL software<sup>26</sup>. At the same time, the gene-based  $P$  values were  
316 aggregated by aggregated Cauchy association test (ACAT) method<sup>27</sup>.

317 We reported the significant associations when the variants/genes meet the following  
318 criteria: (i)  $P < 0.05$  in both discovery and replication sets; (ii) reach genome-wide  
319 significant level ( $P < 5 \times 10^{-8}$ ) in the meta-analysis for variant-level or pass Bonferroni  
320 correction threshold  $P < 2.5 \times 10^{-6}$  (nearly 20,000 protein-coding genes tested) for  
321 gene-level.

### 322 *Shared genetics analyses to identify potential genes across cancers*

323 To discover more potential variants associated with multiple cancers, we applied a  
324 cross-trait meta-analysis using Association analysis based on SubSETs (ASSET)<sup>28</sup>.  
325 ASSET is a statistical tool specifically designed to be powerful for pooling  
326 association signals across multiple cancers when true effects may exist only in a  
327 subset of the cancers. We considered both one-sided (one-directional) and two-sided  
328 (bidirectional) ASSET. Variants with association  $P < 1 \times 10^{-4}$  in any cancer type were  
329 included. Variants were considered significant while reaching  $P_{\text{overall}} < 5 \times 10^{-8}$  and  $P <$   
330 0.05 for each side in bidirectional tests.

### 331 *Comparison analyses for gene expression in tumor and healthy normal tissues*

332 The UCSC Toil Recompute Compendium provides processed transcript-level  
333 RNA-Seq data from TCGA tumor tissues and GTEx healthy normal tissues quantified  
334 using a unified computational pipeline to remove computational batch effects. We

used this data to perform comparative analysis across tumor and health normal tissues from both projects <sup>29</sup>. All the gene expression values were normalized to transcripts per million (TPM) and then logarithmically transformed. After filtering, 15 tissue types with sample size > 100, including 7,085 TCGA tumor tissues and 4,311 GTEx normal tissues, were analyzed (Table S12). We used Student's t-test ( $P_{\text{bonferroni}} < 0.05$ ) and fold change ( $FC > 1.5$  or  $FC < 0.5$ ) to identify the differential gene expression between tumor and healthy normal tissues.

### 342 ***Pathway enrichment analysis***

We collected the pathway information with gene sets from the KEGG database, containing a total of 186 pathways up to March 2022. All enrichment analyses were performed using the R package *clusterProfiler* <sup>30</sup>.

### 346 ***Comparison analyses for protein abundance in tumor and adjacent normal tissues***

The National Cancer Institute's Clinical Proteomic Tumor Analysis Consortium (CPTAC) is a national effort to accelerate the understanding of the molecular basis of cancer through the application of large-scale proteome and genome analysis <sup>31</sup>. Eleven cancer types with available protein abundance data of 1,270 tumor tissues and 845 adjacent normal tissues were collected from ten tissue types (Table S13). The differential proteins were identified following the same criteria with gene expression.

### 353 ***Protein-protein interaction analysis***

To further understand the protein-protein interactions, we used the STRING database, which considered both physical interactions as well as functional associations <sup>32</sup>. The protein interaction network was clustered into different colors using Markov Clustering (MCL).

## 358 ***Polygenic risk score generation***

359 The polygenic risk score (PRS) aggregates the effects of numerous genetic variants  
 360 into a single number which predicts genetic predisposition for a phenotype. To  
 361 investigate the association of PRS with cancer risk, we generated the PRS based on  
 362 previous literature reports. The SNP information and score weights were collected  
 363 from the PGS Catalog database<sup>33</sup>. PGS Catalog is an open database of published  
 364 PRSs, covering >2,000 scores for various phenotypes. If multiple PRSs were reported  
 365 for one cancer, we selected the one generated from the largest sample size. After  
 366 filtering, 17 PRSs were collected and generated in UKB imputed genotype population  
 367 (data field 22828: Imputation from genotype), except for liver, stomach, and sarcoma  
 368 cancers that did not have reported PRSs (Table S14).

## 369 ***Development and validation of the risk stratification models based on rare variants***

370 We developed an exome-wide risk score (ERS) for population risk stratification based  
 371 on rare variants (MAF<0.05) for each cancer separately. The analyses were restricted  
 372 to incident cancers. To perform independent training and validation phases, the  
 373 selected variants and weights were determined using the association information in  
 374 the discovery set.

375 We select the rare genetic variants reaching  $P < 1 \times 10^{-4}$  in the discovery set as the first  
 376 step. The variants identified in this analysis were further screened through penalized  
 377 regression using the least absolute shrinkage and selection operator (LASSO) after  
 378 10-fold cross-validation to reduce the overfitting and collinearity problem. When high  
 379 correlation exists, variants representing independent loci with the strongest statistical  
 380 significance were retained. The ERS was generated as:  $ERS = \sum_1^n \beta_i G_i$ , where  $\beta_i$   
 381 denoted the coefficient of the  $i^{\text{th}}$  variant  $G_i$  calculated by SAIGE in the discovery

382 set.

383 In the validation phase, the variant panel with previously determined weights was  
384 used to generate ERS in the replication set.

385 We used person-year to describe the absolute cancer incidence risk, which was  
386 defined as the time gap from the date of cohort enrollment to cancer diagnosis or the  
387 last follow-up, whichever came first. Hazard ratios (HRs) and 95% confidence  
388 interval (CI) were used to evaluate the association between ERS and cancer risk based  
389 on Cox proportional hazards models, adjusting for age, sex (excluding sex-specific  
390 cancer), and top ten principal components. We compared effect sizes of ERS for  
391 cancer risk based on the top 5% (extremely high-risk), 5~25% (high-risk), and bottom  
392 75% (low-risk) percentile of ERS. The discrimination performance of the risk scores  
393 were evaluated by Harrell's C-index.

394

395

## 396 **Discussion**

397 In this study, we comprehensively evaluated the susceptibility between genetic  
398 variants on human exome and 20 primary cancer types in approximately 420,000  
399 UKB participants of European ancestry. To our knowledge, this is the first  
400 exome-wide pan-cancer study including almost the whole UKB population, which  
401 could improve the statistical power compared with some previous studies using the  
402 early-phase UKB 200k population<sup>34,35</sup>. Trans-omics analyses were performed to  
403 evaluate the functional evidence of identified signals, including genomics,  
404 transcriptomics, and proteomics. Moreover, through establishing the independent  
405 discovery and replication sets, the signals identified and the risk stratification models  
406 could be validated externally to ensure their robustness, especially for the rare  
407 variants with smaller MAF.

Our first major finding discovers exome-wide signals associated with multiple cancers. In the ExWAS analyses, the identified protein-coding variants in *CHEK2* (known as c.1100del), *BRCA1/2*, *ATM* have been reported associated with cancers in previous studies<sup>36</sup>. Based on such a large-scale population, novel variants and genes were also identified. For example, the missense variant rs6998061 in *POU5F1B*, which was predicted as a possibly damaging SNV by VEP, was associated with prostate and colorectal cancers. *POU5F1B* was a protein-coding gene highly homologous to *OCT4*<sup>37</sup>, which was recently shown to be transcribed in cancer cells. It has been found related to tumorigenicity and tumor growth *in vivo* and could promote angiogenesis and cell proliferation and inhibits apoptosis in cancer cells<sup>38</sup>. The stop lost variant rs387907272, predicted as probably damaging in *MYD88*, was associated with leukemia and NHL. *MYD88* encodes a cytosolic adapter protein that plays a central role in the innate and adaptive immune response<sup>39</sup>. It functions as an essential signal transducer in the interleukin-1 and Toll-like receptor signaling pathways<sup>40</sup>. Moreover, mutations in *MYD88* could activate NF-κB and its associated signaling pathways, thereby promoting B-cell proliferation and survival<sup>41</sup>. Thus, this germline mutation might be a promising target for clinical implications. Moreover, we identified multiple SNVs located in 16q24.3 that were shared between skin cancer and melanoma, including *VPS9DI*, *MC1R*, and *TUBB3*. *VPS9DI*, a protein-coding gene that affects protein binding activity, was significantly associated with skin cancer and melanoma. Although its role in cancer has not been reported, its antisense *VPS9DI-AS1* could promote tumorigenesis and progression by mediating micro RNAs via the Wnt/β-catenin signaling pathway in multiple cancers<sup>42,43</sup>. Human *MC1R* has an inefficient poly(A) site allowing intergenic splicing with its downstream neighbor *TUBB3*, which were involved in melanogenesis. Melanogenesis is a key parameter of differentiation in melanocytes and melanoma cells that could affect the treatment of pigmentary disorders<sup>44</sup>. Therefore, the SNVs and genes we identified had remarkable biological functions that were practical for precise clinical implications.

Our second major finding identified the pleiotropic variants shared among cancers. We observed strong functional evidence for the identified genes from KEGG pathway network and protein-protein interaction network through trans-omics analyses for gene expression and protein abundance. We found several essential function modules from proteomics. The DNA damage response and repair agents are widely used in clinical oncology given the expanding role of immune checkpoint blockade as a therapeutic strategy<sup>45</sup>. The HLA locus, located on chromosome 6, is among the most polymorphic regions of the human genome<sup>46</sup>. HLA dysfunction is deeply involved in the immune evasion events in the development and progression of certain cancers<sup>47</sup>. A previous study has reported that somatic mutation in HLA was associated with multiple cancers<sup>48</sup>; we hereby demonstrated that germline mutation in HLA was also relevant. In addition, the keratin family and BPI fold containing family B (BPIFB) were also related to cancers that had certain biological functions<sup>49,50</sup>.

Our third major finding improves the ability for high-risk population identification. It is widely recognized that early screening for cancers is most likely beneficial when the target tumor type has relatively uniform biology and a slower rate of progression<sup>2</sup>. Targeting on high-risk populations with appropriate strategies for early detection could get remarkable benefits of mortality reduction<sup>51-53</sup>. However, the selection of individual to be screened is a complex procedure, with difficulty accurately identifying high-risk persons who are most likely to benefit from screening. Because cancer is heritable, PRS is emerging as the quantitative measurement for individual genetic risk. However, the heritability for common variants identified in GWAS is limited, while the contribution of rare variants could not be ignored. Therefore, we leveraged the rare variants to construct the ERS to offset this limitation. By evaluating C-index and risk stratification, we demonstrated the added values of rare variants.

ERS could be combined with specific tumor screening strategies, suggesting that people with extremely high risk should be screened frequently (e.g., once a year), and

those with high risk should be screened regularly (e.g., once every three years), which is expected to further reduce the cancer mortality. Therefore, ERS is expected to serve as an informative benchmark to incorporate the PRS and baseline information that have been used in cancer risk assessment.

Our work has several strengths. First, we comprehensively evaluated the exome-wide genetic variants in 20 cancer types on variant and gene levels among 420k participants and analyzed the cross-cancer pleiotropy through cross-trait meta-analysis. Second, we explored the relationship between identified genes and cancers at multi-omics levels, including genomics, transcriptomics, and proteomics. The trans-omics analyses revealed that the identified signals were functional. Third, we focused on the high-risk population identification based on exome-wide variants, while few studies developed risk scores using rare variants. We demonstrated the stable performance of ERS across pan-cancer in the replication set, especially for its ability to identify the extremely high-risk persons. Therefore, the ERS might serve as a complementary genetic risk assessment tool combined with the existing screening guidelines.

It is essential to acknowledge the limitations of our study. First, this study was conducted in the UKB population only. Although we established a discovery set and replication set, it is not strictly independent validation. Therefore, future large-scale population studies should be conducted to replicate these findings. Second, we focused on individuals of European ancestry only. Moreover, it is essential to evaluate the associations of variants and performance of ERS in non-European populations. Third, we mainly investigated the genetic effects of population risk stratification. However, the contribution of environmental factors should not be ignored. Well-established risk models incorporated with environmental factors, PRS, and ERS should be developed for specific cancer.

In conclusion, our study provides novel insights into human exomes and rare variants



---

490 through comprehensive analyses of genetic susceptibility to human cancers and  
 491 subsequent target analyses on specific genes and risk stratification.

492

### 493 **Data Availability**

494 UK Biobank data is available from <https://www.ukbiobank.ac.uk/>. TCGA data is  
 495 available from <https://portal.gdc.cancer.gov/>. GTEx data is available from  
 496 <https://www.gtexportal.org/home/>. CPTAC data is available from  
 497 <https://pdc.esacinc.com/pdc/pdc>.

### 498 **Code Availability**

499 The R software codes that support our findings are available from the corresponding  
 500 author by a reasonable request.

501

502

## 503 Reference

- 504 1 Sung, H. *et al.* Global Cancer Statistics 2020: GLOBOCAN Estimates of  
505 Incidence and Mortality Worldwide for 36 Cancers in 185 Countries. *CA: a*  
506 *cancer journal for clinicians* **71**, 209-249, doi:10.3322/caac.21660 (2021).
- 507 2 Shieh, Y. *et al.* Population-based screening for cancer: hope and hype. *Nat Rev*  
508 *Clin Oncol* **13**, 550-565, doi:10.1038/nrclinonc.2016.50 (2016).
- 509 3 Li, N. *et al.* One-off low-dose CT for lung cancer screening in China: a  
510 multicentre, population-based, prospective cohort study. *The Lancet.*  
511 *Respiratory medicine* **10**, 378-391, doi:10.1016/S2213-2600(21)00560-9  
512 (2022).
- 513 4 Kovalchik, S. A. *et al.* Targeting of low-dose CT screening according to the  
514 risk of lung-cancer death. *N Engl J Med* **369**, 245-254,  
515 doi:10.1056/NEJMoa1301851 (2013).
- 516 5 Lichtenstein, P. *et al.* Environmental and heritable factors in the causation of  
517 cancer--analyses of cohorts of twins from Sweden, Denmark, and Finland. *N*  
518 *Engl J Med* **343**, 78-85, doi:10.1056/NEJM200007133430201 (2000).
- 519 6 Rashkin, S. R. *et al.* Pan-cancer study detects genetic risk variants and shared  
520 genetic basis in two large cohorts. *Nat Commun* **11**, 4423,  
521 doi:10.1038/s41467-020-18246-6 (2020).
- 522 7 Visscher, P. M., Yengo, L., Cox, N. J. & Wray, N. R. Discovery and  
523 implications of polygenicity of common diseases. *Science* **373**, 1468-1473,  
524 doi:10.1126/science.abi8206 (2021).
- 525 8 Tam, V. *et al.* Benefits and limitations of genome-wide association studies.  
526 *Nature reviews. Genetics* **20**, 467-484, doi:10.1038/s41576-019-0127-1  
527 (2019).
- 528 9 Barton, A. R., Sherman, M. A., Mukamel, R. E. & Loh, P. R. Whole-exome  
529 imputation within UK Biobank powers rare coding variant association and  
530 fine-mapping analyses. *Nat Genet* **53**, 1260-1269,  
531 doi:10.1038/s41588-021-00892-1 (2021).
- 532 10 Van Hout, C. V. *et al.* Exome sequencing and characterization of 49,960  
533 individuals in the UK Biobank. *Nature* **586**, 749-756,  
534 doi:10.1038/s41586-020-2853-0 (2020).
- 535 11 Cirulli, E. T. *et al.* Genome-wide rare variant analysis for thousands of  
536 phenotypes in over 70,000 exomes from two cohorts. *Nat Commun* **11**, 542,  
537 doi:10.1038/s41467-020-14288-y (2020).

- 538 12 Lewis, C. M. & Vassos, E. Polygenic risk scores: from research tools to  
539 clinical instruments. *Genome medicine* **12**, 44,  
540 doi:10.1186/s13073-020-00742-5 (2020).
- 541 13 Polygenic Risk Score Task Force of the International Common Disease, A.  
542 Responsible use of polygenic risk scores in the clinic: potential benefits, risks  
543 and gaps. *Nat Med* **27**, 1876-1884, doi:10.1038/s41591-021-01549-6 (2021).
- 544 14 Wainschtein, P. *et al.* Assessing the contribution of rare variants to complex  
545 trait heritability from whole-genome sequence data. *Nat Genet* **54**, 263-273,  
546 doi:10.1038/s41588-021-00997-7 (2022).
- 547 15 Singh, T. *et al.* Rare coding variants in ten genes confer substantial risk for  
548 schizophrenia. *Nature* **604**, 509-516, doi:10.1038/s41586-022-04556-w  
549 (2022).
- 550 16 Backman, J. D. *et al.* Exome sequencing and analysis of 454,787 UK Biobank  
551 participants. *Nature* **599**, 628-634, doi:10.1038/s41586-021-04103-z (2021).
- 552 17 Sun, B. B. *et al.* Genetic associations of protein-coding variants in human  
553 disease. *Nature* **603**, 95-102, doi:10.1038/s41586-022-04394-w (2022).
- 554 18 Buniello, A. *et al.* The NHGRI-EBI GWAS Catalog of published  
555 genome-wide association studies, targeted arrays and summary statistics 2019.  
556 *Nucleic Acids Res* **47**, D1005-D1012, doi:10.1093/nar/gky1120 (2019).
- 557 19 Szustakowski, J. D. *et al.* Advancing human genetics research and drug  
558 discovery through exome sequencing of the UK Biobank. *Nat Genet* **53**,  
559 942-948, doi:10.1038/s41588-021-00885-0 (2021).
- 560 20 Zhou, W. *et al.* Scalable generalized linear mixed model for region-based  
561 association tests in large biobanks and cohorts. *Nat Genet* **52**, 634-639,  
562 doi:10.1038/s41588-020-0621-6 (2020).
- 563 21 Zhou, W. *et al.* Efficiently controlling for case-control imbalance and sample  
564 relatedness in large-scale genetic association studies. *Nat Genet* **50**, 1335-1341,  
565 doi:10.1038/s41588-018-0184-y (2018).
- 566 22 McLaren, W. *et al.* The Ensembl Variant Effect Predictor. *Genome biology* **17**,  
567 122, doi:10.1186/s13059-016-0974-4 (2016).
- 568 23 Sauna, Z. E. & Kimchi-Sarfaty, C. Understanding the contribution of  
569 synonymous mutations to human disease. *Nature reviews. Genetics* **12**,  
570 683-691, doi:10.1038/nrg3051 (2011).
- 571 24 Shen, X., Song, S., Li, C. & Zhang, J. Synonymous mutations in  
572 representative yeast genes are mostly strongly non-neutral. *Nature*,  
573 doi:10.1038/s41586-022-04823-w (2022).

- 
- 574 25 Wang, Q. *et al.* Rare variant contribution to human disease in 281,104 UK  
575 Biobank exomes. *Nature* **597**, 527-532, doi:10.1038/s41586-021-03855-y  
576 (2021).
- 577 26 Willer, C. J., Li, Y. & Abecasis, G. R. METAL: fast and efficient meta-analysis  
578 of genomewide association scans. *Bioinformatics* **26**, 2190-2191,  
579 doi:10.1093/bioinformatics/btq340 (2010).
- 580 27 Liu, Y. *et al.* ACAT: A Fast and Powerful p Value Combination Method for  
581 Rare-Variant Analysis in Sequencing Studies. *Am J Hum Genet* **104**, 410-421,  
582 doi:10.1016/j.ajhg.2019.01.002 (2019).
- 583 28 Bhattacharjee, S. *et al.* A subset-based approach improves power and  
584 interpretation for the combined analysis of genetic association studies of  
585 heterogeneous traits. *Am J Hum Genet* **90**, 821-835,  
586 doi:10.1016/j.ajhg.2012.03.015 (2012).
- 587 29 Vivian, J. *et al.* Toil enables reproducible, open source, big biomedical data  
588 analyses. *Nat Biotechnol* **35**, 314-316, doi:10.1038/nbt.3772 (2017).
- 589 30 Yu, G., Wang, L.-G., Han, Y. & He, Q.-Y. clusterProfiler: an R package for  
590 comparing biological themes among gene clusters. *Omics: a journal of*  
591 *integrative biology* **16**, 284-287 (2012).
- 592 31 Satpathy, S. *et al.* A proteogenomic portrait of lung squamous cell carcinoma.  
593 *Cell* **184**, 4348-4371 e4340, doi:10.1016/j.cell.2021.07.016 (2021).
- 594 32 Szklarczyk, D. *et al.* The STRING database in 2021: customizable  
595 protein-protein networks, and functional characterization of user-uploaded  
596 gene/measurement sets. *Nucleic Acids Res* **49**, D605-D612,  
597 doi:10.1093/nar/gkaa1074 (2021).
- 598 33 Lambert, S. A. *et al.* The Polygenic Score Catalog as an open database for  
599 reproducibility and systematic evaluation. *Nat Genet* **53**, 420-425,  
600 doi:10.1038/s41588-021-00783-5 (2021).
- 601 34 Zeng, C. *et al.* Association of Pathogenic Variants in Hereditary Cancer Genes  
602 With Multiple Diseases. *JAMA Oncol*, doi:10.1001/jamaoncol.2022.0373  
603 (2022).
- 604 35 Cheng, S. *et al.* Exome-wide screening identifies novel rare risk variants for  
605 major depression disorder. *Mol Psychiatry*, doi:10.1038/s41380-022-01536-4  
606 (2022).
- 607 36 Reiner, A. S. *et al.* Radiation Treatment, ATM, BRCA1/2, and  
608 CHEK2\*1100delC Pathogenic Variants and Risk of Contralateral Breast  
609 Cancer. *J Natl Cancer Inst* **112**, 1275-1279, doi:10.1093/jnci/djaa031 (2020).

- 
- 610 37 Breyer, J. P. *et al.* An expressed retrogene of the master embryonic stem cell  
611 gene POU5F1 is associated with prostate cancer susceptibility. *Am J Hum*  
612 *Genet* **94**, 395-404, doi:10.1016/j.ajhg.2014.01.019 (2014).
- 613 38 Hayashi, H. *et al.* The OCT4 pseudogene POU5F1B is amplified and  
614 promotes an aggressive phenotype in gastric cancer. *Oncogene* **34**, 199-208,  
615 doi:10.1038/onc.2013.547 (2015).
- 616 39 Cohen, P. & Strickson, S. The role of hybrid ubiquitin chains in the MyD88  
617 and other innate immune signalling pathways. *Cell Death Differ* **24**,  
618 1153-1159, doi:10.1038/cdd.2017.17 (2017).
- 619 40 Salcedo, R., Cataisson, C., Hasan, U., Yuspa, S. H. & Trinchieri, G. MyD88  
620 and its divergent toll in carcinogenesis. *Trends Immunol* **34**, 379-389,  
621 doi:10.1016/j.it.2013.03.008 (2013).
- 622 41 de Groen, R. A. L., Schrader, A. M. R., Kersten, M. J., Pals, S. T. & Vermaat, J.  
623 S. P. MYD88 in the driver's seat of B-cell lymphomagenesis: from molecular  
624 mechanisms to clinical implications. *Haematologica* **104**, 2337-2348,  
625 doi:10.3324/haematol.2019.227272 (2019).
- 626 42 Wang, X. *et al.* ZEB1 activated-VPS9D1-AS1 promotes the tumorigenesis and  
627 progression of prostate cancer by sponging miR-4739 to upregulate MEF2D.  
628 *Biomed Pharmacother* **122**, 109557, doi:10.1016/j.biopha.2019.109557  
629 (2020).
- 630 43 Ettinger, D. S. *et al.* NCCN Guidelines Insights: Non-Small Cell Lung Cancer,  
631 Version 2.2021. *J Natl Compr Canc Netw* **19**, 254-266,  
632 doi:10.6004/jnccn.2021.0013 (2021).
- 633 44 Kleszczynski, K. *et al.* Melatonin exerts oncostatic capacity and decreases  
634 melanogenesis in human MNT-1 melanoma cells. *J Pineal Res* **67**, e12610,  
635 doi:10.1111/jpi.12610 (2019).
- 636 45 Mouw, K. W., Goldberg, M. S., Konstantinopoulos, P. A. & D'Andrea, A. D.  
637 DNA Damage and Repair Biomarkers of Immunotherapy Response. *Cancer*  
638 *Discov* **7**, 675-693, doi:10.1158/2159-8290.CD-17-0226 (2017).
- 639 46 Cabrera, T., Lopez-Nevot, M. A., Gaforio, J. J., Ruiz-Cabello, F. & Garrido, F.  
640 Analysis of HLA expression in human tumor tissues. *Cancer Immunol*  
641 *Immunother* **52**, 1-9, doi:10.1007/s00262-002-0332-0 (2003).
- 642 47 Lawrence, M. S. *et al.* Discovery and saturation analysis of cancer genes  
643 across 21 tumour types. *Nature* **505**, 495-501, doi:10.1038/nature12912  
644 (2014).
- 645 48 Shukla, S. A. *et al.* Comprehensive analysis of cancer-associated somatic

---

646 mutations in class I HLA genes. *Nat Biotechnol* **33**, 1152-1158,  
647 doi:10.1038/nbt.3344 (2015).

648 49 Karantza, V. Keratins in health and cancer: more than mere epithelial cell  
649 markers. *Oncogene* **30**, 127-138, doi:10.1038/onc.2010.456 (2011).

650 50 Li, J. *et al.* Molecular biology of BPIFB1 and its advances in disease. *Ann*  
651 *Transl Med* **8**, 651, doi:10.21037/atm-20-3462 (2020).

652 51 Independent, U. K. P. o. B. C. S. The benefits and harms of breast cancer  
653 screening: an independent review. *Lancet* **380**, 1778-1786,  
654 doi:10.1016/S0140-6736(12)61611-0 (2012).

655 52 Jonas, D. E. *et al.* Screening for Lung Cancer With Low-Dose Computed  
656 Tomography: Updated Evidence Report and Systematic Review for the US  
657 Preventive Services Task Force. *JAMA* **325**, 971-987,  
658 doi:10.1001/jama.2021.0377 (2021).

659 53 Buskermolen, M. *et al.* Colorectal cancer screening with faecal  
660 immunochemical testing, sigmoidoscopy or colonoscopy: a microsimulation  
661 modelling study. *BMJ* **367**, l5383, doi:10.1136/bmj.l5383 (2019).

662

663

## Figure legends

**Figure 1.** (a) Manhattan plot for the single variant association results in ExWAS. The blue dash line indicates the genome-wide significance level ( $P < 5 \times 10^{-8}$ ). (b) Manhattan plot for the gene-based association results in ExWAS. The blue dash line indicates the Bonferroni correction level ( $P < 2.5 \times 10^{-6}$ ). (c) The heatmap of variant-level and gene-level association results for the genes shared at least two cancer types. We report the signal if it reaches nominal  $P < 0.05$  in the corresponding cancer type (red: odds ratio (OR)  $> 1$ ; blue: OR  $< 1$ ). The grey color indicates association  $P > 0.05$ .

**Figure 2.** (a) Circos plot for the genes identified in the cross-trait meta-analysis. (b) Heatmap for the number of shared genetic variants across each cancer pair. The red color indicates the shared variants with one-directional effects. The blue color indicates the shared variants with bidirectional effects between the cancer pairs.

**Figure 3.** (a) Heatmap of fold change (FC) values to compare gene expression between TCGA tumor tissues and GTEx healthy normal tissues. (b) Volcano plot for the FC values and  $-\log(P)$  values for comparison of gene expression. (c) Heatmap of FC values to compare protein abundance between CPTAC tumor tissues and adjacent normal tissues. NA: not available. (d) Volcano plot for the FC values and  $-\log(P)$  values for comparison of protein abundance. (e) KEGG pathway network from the enrichment analysis of the pleiotropic genes. (f) Protein-protein interaction network of the signal genes and pleiotropic genes.

**Figure 4.** Cumulative cancer incidence plot for the 20 cancer types in the replication set (WES-150k). The red line indicates the extremely high-risk persons, the green line indicates the high-risk population, and the blue line indicates the low-risk persons. The  $P$  values were calculated using the log-rank tests.

---

689 **Figure 5.** (a) The dot plot of the hazard ratios (HRs) and 95% confidence intervals  
690 (CIs) of exome-wide risk scores (ERS). The low-risk subgroup (blue dot) was set as  
691 the reference group. The red dot indicates the extremely high-risk persons, the green  
692 dot indicates the high-risk population. (b) The dot plot of the HRs and 95% CIs of  
693 polygenic risk scores (PRS) for 17 cancer types, while liver, stomach, and sarcoma  
694 cancers did not have reported PRSs. (c) The C-index values of ERS and PRS  
695 generated by the Cox regression model.

## 696 **Supplementary Figures**

697 Figure S1. Q-Q plots of single variant tests for each cancer

698 Figure S2. Q-Q plot combining all the P values of pan-cancer

699 Figure S3. Manhattan plot for the single variant analyses of each cancer

700 Figure S4. Cumulative cancer incidence plot for the 20 cancer types in the whole  
701 UKB-450k population.

702 Figure S5. Histogram of the exome-wide risk scores (ERS) in each cancer

703 Figure S6. Density plot of the exome-wide risk scores (ERS) in cases and controls

## 704 **Supplementary Tables**

705 Table S1. Demographic characteristics in the UK Biobank cohort

706 Table S2. Association results for independent single variants with  $P < 5 \times 10^{-8}$  in the  
707 whole UKB-450k population

708 Table S3. Association results for single variants with  $P < 5 \times 10^{-8}$  in at least two cancer  
709 types

710 Table S4. Association results for genes with  $P < 2.5 \times 10^{-6}$  in the whole UKB-450k  
711 population



---

|     |                                                                                                    |
|-----|----------------------------------------------------------------------------------------------------|
| 712 | Table S5. Association results for genes with $P < 2.5 \times 10^{-6}$ in at least two cancer types |
| 713 | Table S6. Cross-trait meta-analysis results for single variants with one-directional               |
| 714 | effects                                                                                            |
| 715 | Table S7. Cross-trait meta-analysis results for single variants with bidirectional effects         |
| 716 | Table S8. Number of independent shared genetic variants in the cross-trait                         |
| 717 | meta-analysis                                                                                      |
| 718 | Table S9. KEGG enrichment analysis for the genes identified in cross-trait                         |
| 719 | meta-analysis                                                                                      |
| 720 | Table S10. Model parameters for the exome-wide risk scores (ERS) in 20 cancer types                |
| 721 | Table S11. Correlation analysis for ERS and PRS                                                    |
| 722 | Table S12. Number of tissues included in the comparison analyses for gene                          |
| 723 | expression in tumor and healthy normal tissues                                                     |
| 724 | Table S13. Number of tissues included in the comparison analyses for protein                       |
| 725 | abundance in CPTAC                                                                                 |
| 726 | Table S14. Information of the selected polygenic risk score (PRS) in PGS catalog                   |
| 727 |                                                                                                    |

**a Variant-level**

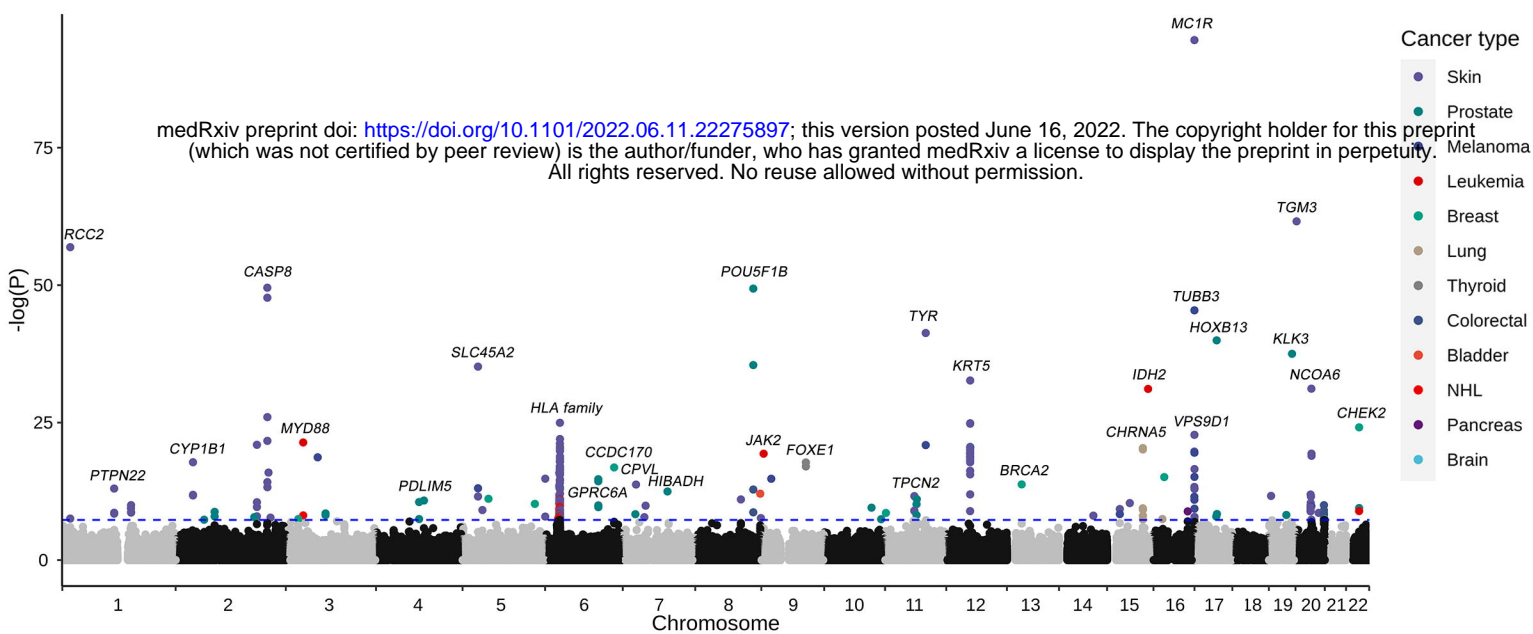

**b Gene-level**

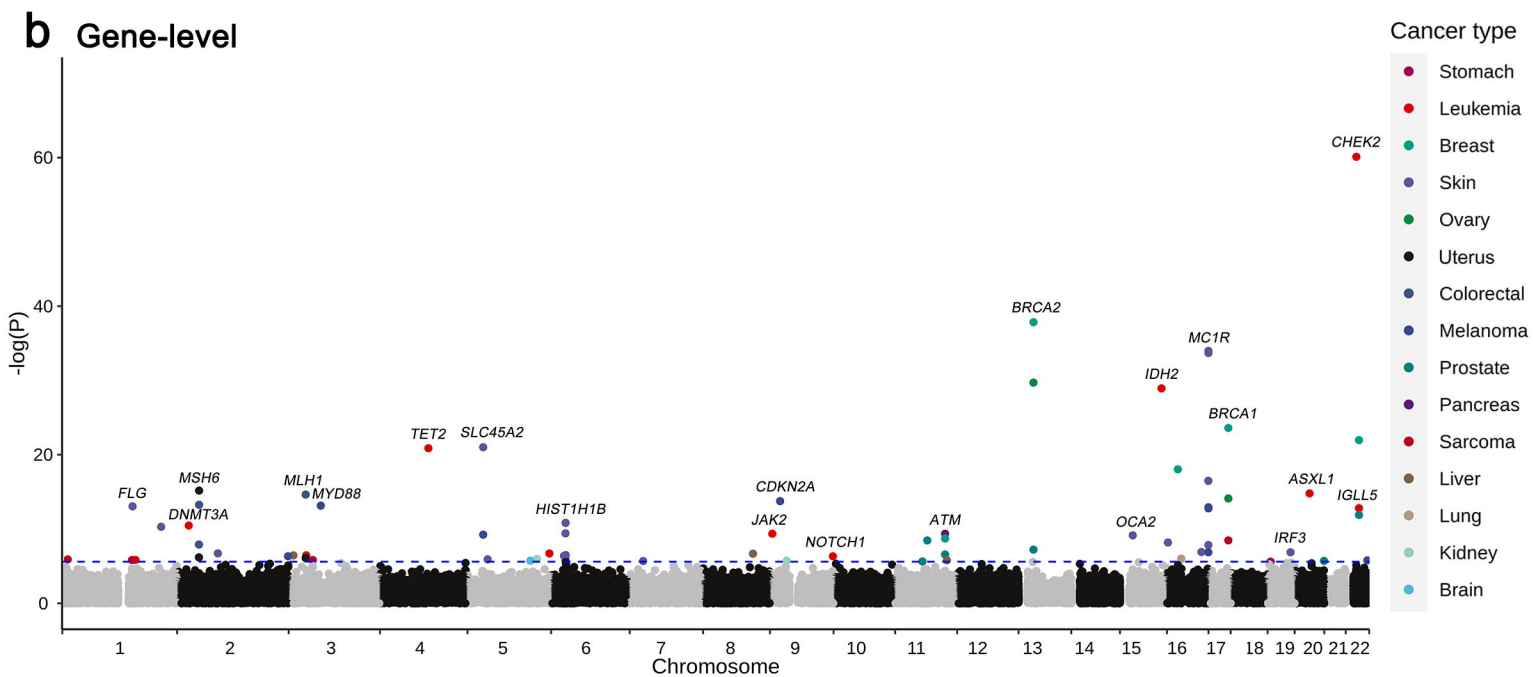

**c**

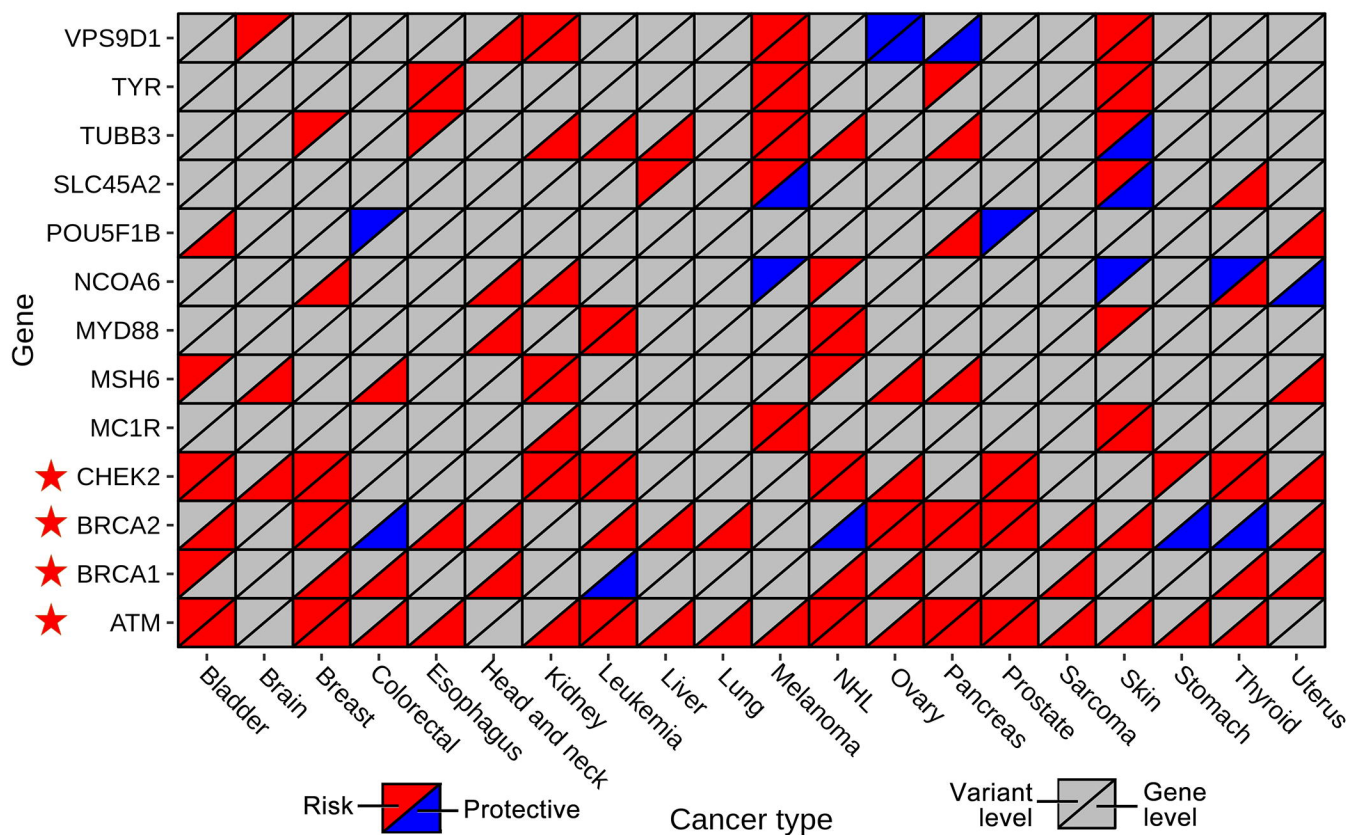





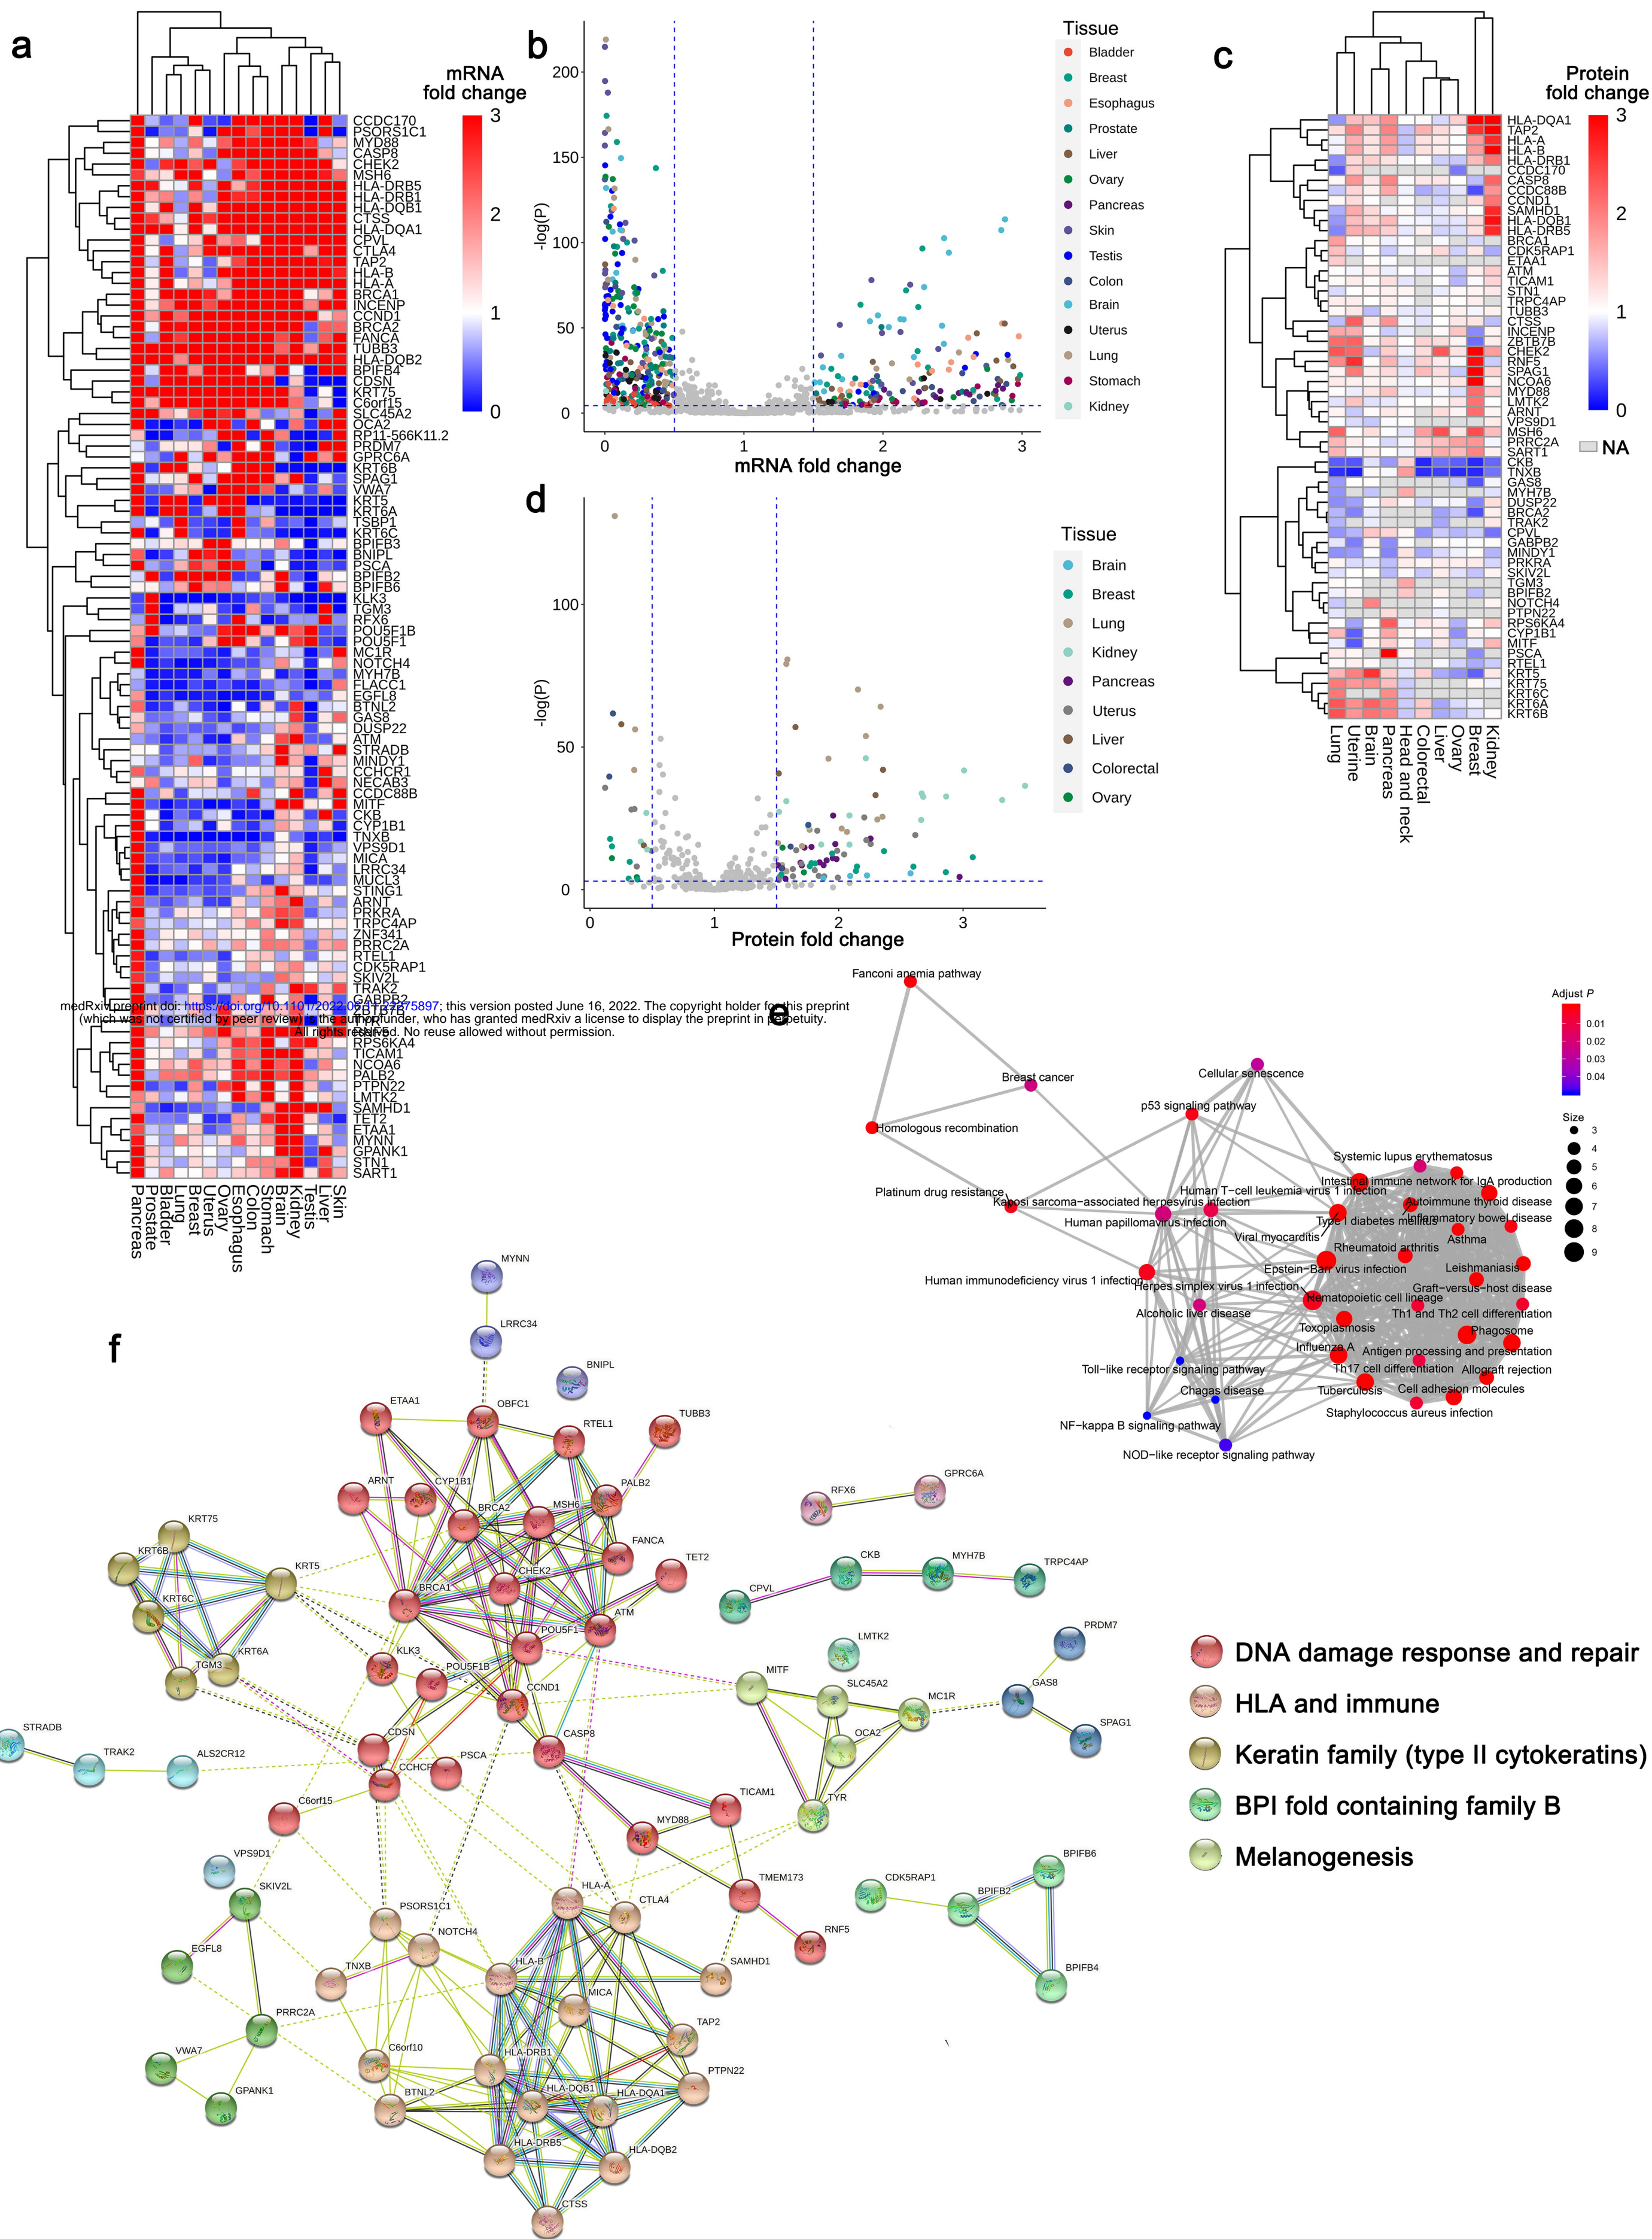



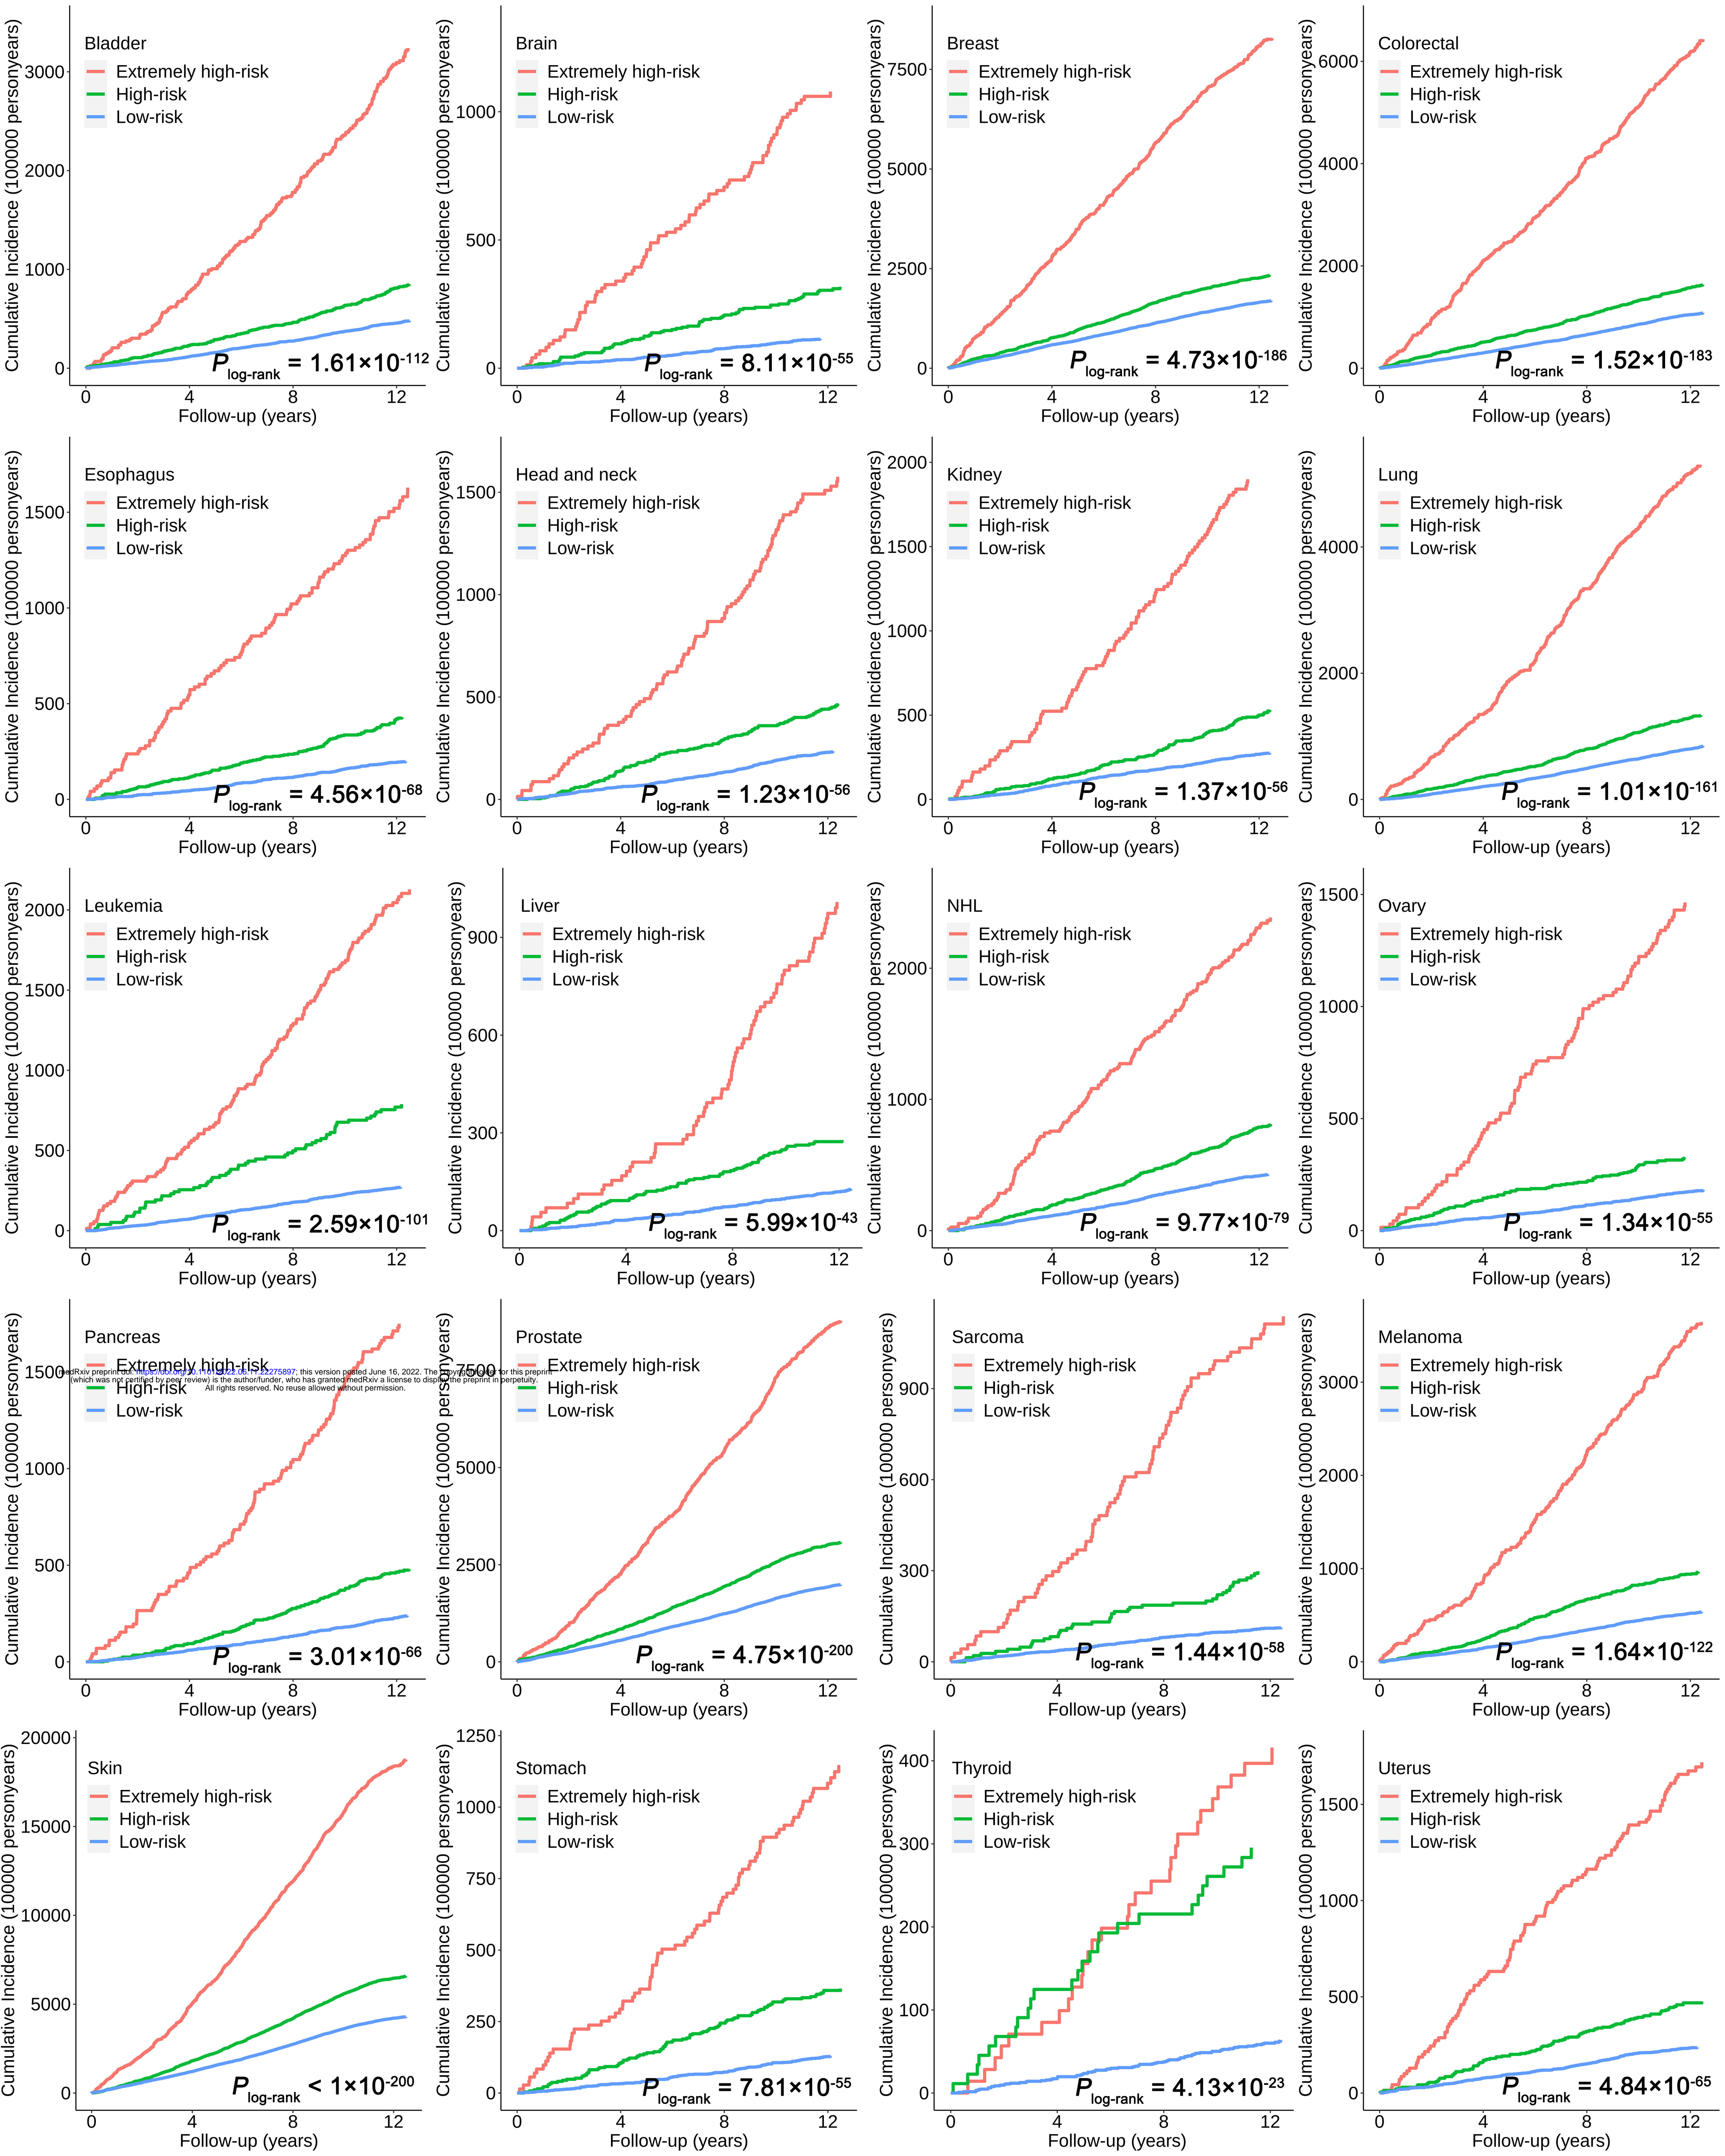



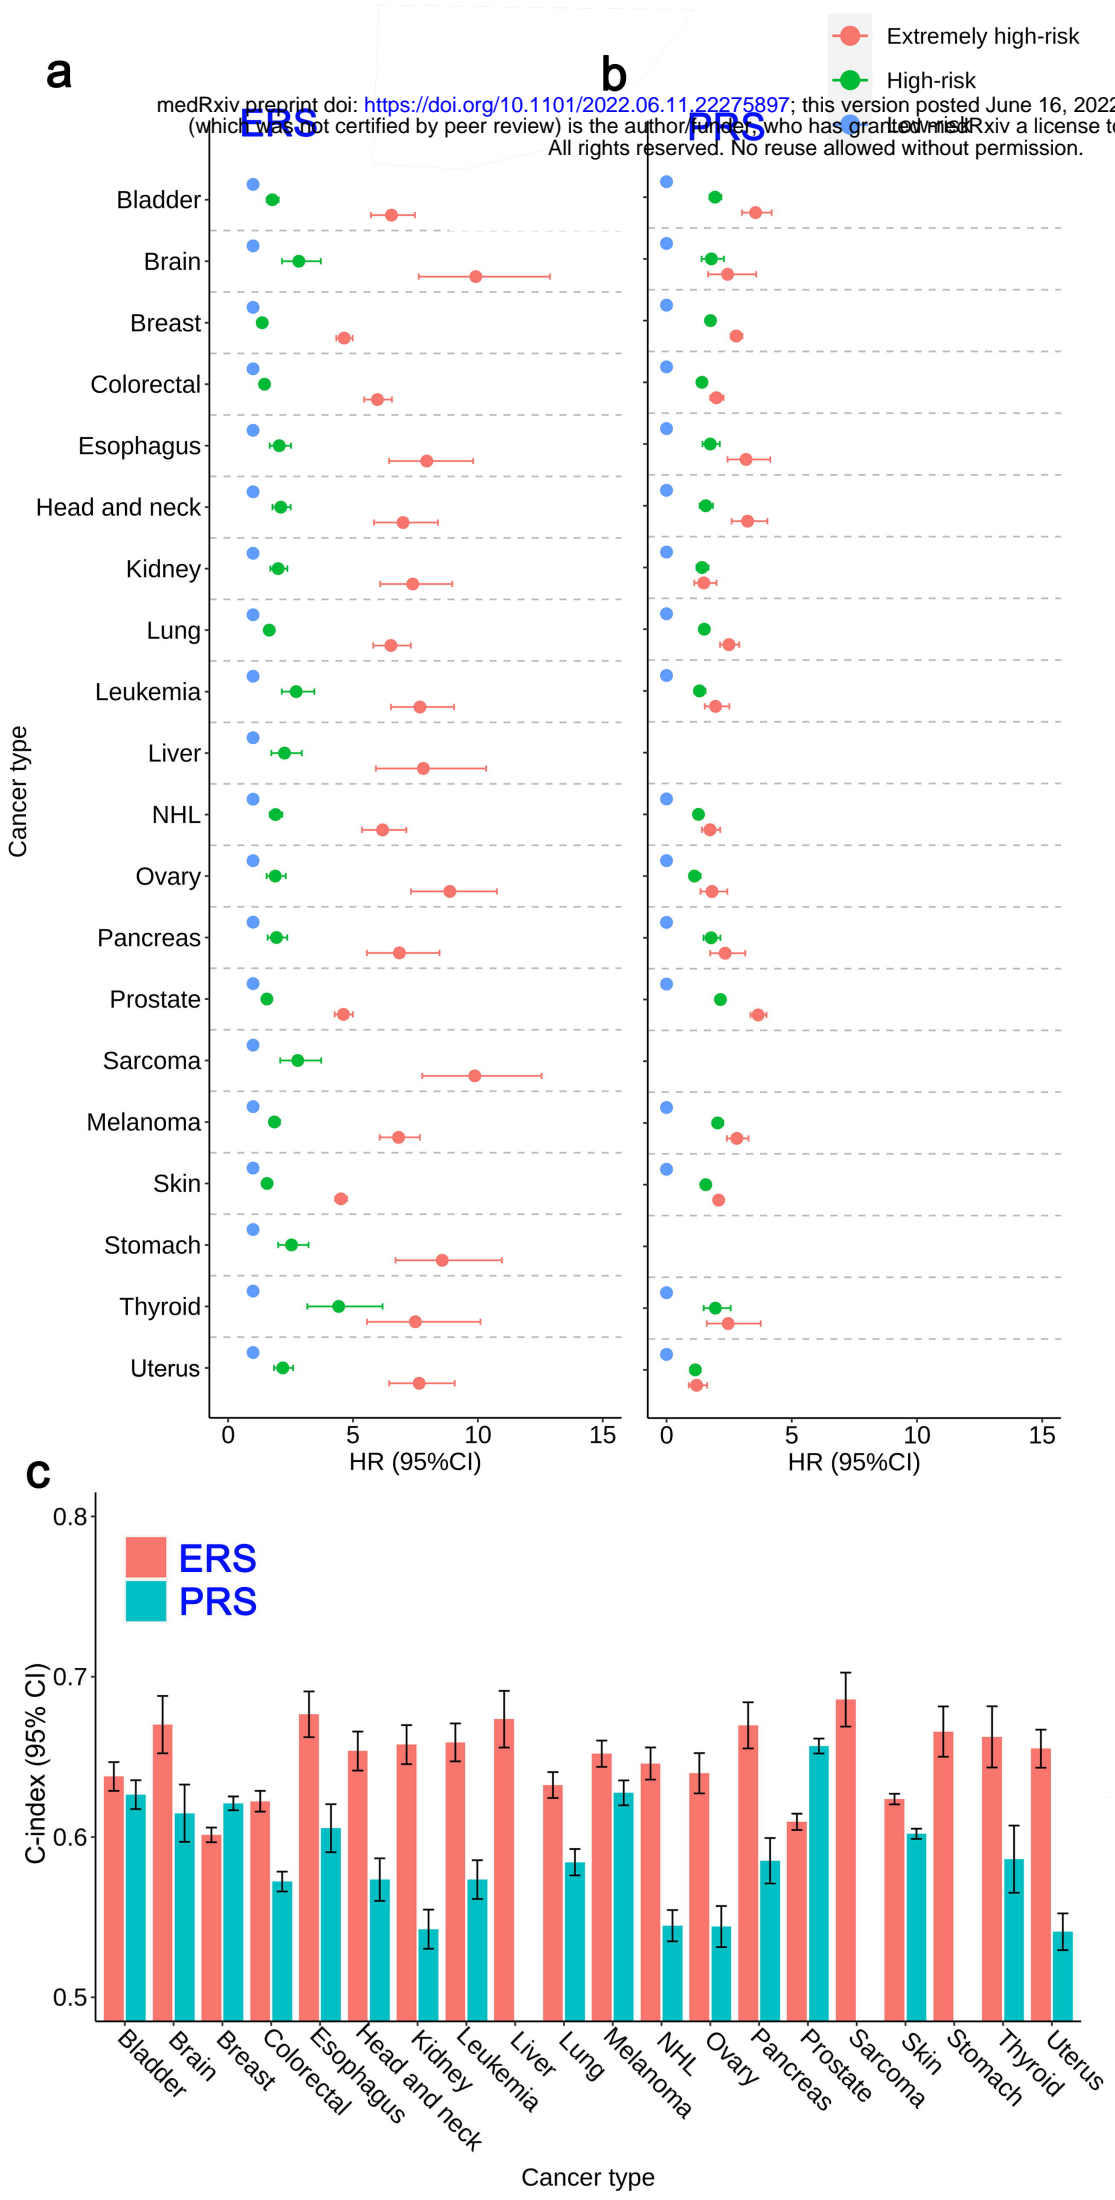

Source: http://medrxiv.stage.highwire.org/content/10.1101/2022.06.11.22275897v1.full.pdf
